# Supplementary material for: Heterogeneity in Thymic Emigrants: Implications for Thymectomy and Immunosenescence
Source: PLOS journal article supplement (doi:10.1371/journal.pone.0049554), 2013-02-27
Supplement: S2 (10.1371/journal.pone.0049554.s002) [file journal.pone.0049554.s002]

## S2: Estimating the survivorship directly from timecourses of PTK7<sup>+</sup> numbers

The survivorship function can be estimated from the timecourse of PTK7<sup>+</sup> naive CD4<sup>+</sup> T cell numbers post-thymectomy, as follows:

$$\frac{dX^*(t)}{dt} = \frac{dX(t)}{dt} - \lim_{\Delta t \rightarrow 0} \frac{\int_{t_0}^{t+\Delta t} (1-p)\theta(a)F_a(t+\Delta t-a)da - \int_{t_0}^t (1-p)\theta(a)F_a(t-a)da}{\Delta t} \quad (12)$$

where  $F_a(t)$  is the fraction of cells from a cohort of emigrants leaving the thymus at age  $a$  that remain in the PTK7<sup>+</sup> pool for  $t$  days. We let  $dX(t)/dt \approx 0$  since the observed change in PTK7<sup>+</sup> naive CD4<sup>+</sup> T cell numbers is negligible in non-thymectomised children over a 6 month period (5). A change of variables ( $a = a' + \Delta t$ ) is used to rewrite the first integral, as follows:

$$\frac{dX^*(t)}{dt} \approx -(1-p) \lim_{\Delta t \rightarrow 0} \frac{\int_{t_0-\Delta t}^t \theta(a' + \Delta t)F_{a'+\Delta t}(t-a')da' - \int_{t_0}^t \theta(a)F_a(t-a)da}{\Delta t}. \quad (13)$$

We make the following simplifying assumptions: (a)  $\theta(a' + \Delta t) \approx \theta(a')$ , where we argue that thymic production diminishes over a number of decades and hence the change over some small period  $\Delta t$  is likely to be negligible; and (b)  $F(t - a') \approx F(t - a)$ , where it is not unreasonable to assume that PTK7 survival prospects will be similar for cohorts of thymic emigrants leaving the thymus  $\Delta t$  days apart. As a result, equation (??) becomes:

$$\begin{aligned} \frac{dX^*(t)}{dt} &\approx -(1-p) \lim_{\Delta t \rightarrow 0} \frac{\int_{t_0-\Delta t}^{t_0} \theta(a)F(t-a)da}{\Delta t} \\ &\approx -(1-p)\theta(t_0)F(t-t_0) \end{aligned} \quad (14)$$

Since all T cells leaving the thymus are assumed to enter the PTK7<sup>+</sup> population at day 0,  $F(0) = 1$  and so

$$\theta(t_0) \approx -\frac{1}{1-p} \frac{dX^*(t_0)}{dt}. \quad (15)$$

Substituting this into equation (??) gives the following expression for the survivorship function (equation (4) in the text):

$$F(t-t_0) \approx \frac{dX^*(t-t_0)}{dt} / \frac{dX^*(t_0)}{dt}. \quad (16)$$
